# Supplementary material for: Beyond the Binding Site: In Vivo Identification of tbx2, smarca5 and wnt5b as Molecular Targets of CNBP during Embryonic Development
Source: PLoS One. 2013 May 7;8(5):e63234. doi: 10.1371/journal.pone.0063234 (PMC3646763; doi:10.1371/journal.pone.0063234)
Supplement: Table S4 — Gene lists and Gene Ontology Data. (XLSX) [file pone.0063234.s006.xlsx]

## Sheet: Gene Lists
Danio rerio genes	Mus musculus genes
arm	13 days embryo head cdna
cdk11b	1700029i01rik
col10A1	1700106j16rik
dpp6	4930524b15rik
ENSDART00000128121	a730011l01rik
ftr34	acr
ftr65	acyp2
gna14	adcy2
gpr1	adprhl2
ino80d	ai466991
iqsec3	ak045106
marcks	alms1
mast4	ankyrin repeat containing protein
ncf4	arid1b
ntrk2b	arntl2
pde4b	asph
pgap2	atp8a2
pvalv7	bc075659
rnu2	bcas3
shisa Homolog 8	bcl7a
slc35e2b	c230004f18rik
smgg	c2orf71
srfs12	cdc26
unc13b	cdv3
zdhhc	cldn1
zgc:110249	clip4
zgc:172191	cml3
zgc:55870	cntnap1
zgc:85716	co802958/by674540
	col24a1
	col8a2
	csmd2
	dennd1a
	dnm3
	dock4
	eif2c3
	emid2
	ensmust00000099683
	ensmust00000146041
	ept1
	erc1
	fam134b
	fkbp15
	flna
	flnb
	fzd4
	gak
	gapdh
	gcap14
	gm10165
	gm1060
	gm10911
	gm13298
	gm16508
	gpc5
	h3f3a
	hipk3
	hmgb4
	hnrnpc1/c2
	ibsp
	il31
	inhba
	inpp5a
	krab box protein
	larp4
	linc rna
	lincrna
	lrrc43
	mepe
	mid1
	mipep
	mirna
	mirna1902
	mlxip
	mup20
	mus musculus adult male testis cdna
	nat8
	nav3
	nlgn4
	npffr2
	nsg2
	obox3
	obp3
	ofcc1
	olfr656
	opsin 1
	osbpl9
	pex11a
	pla2g4e
	plin1
	pls3
	rabl2
	rnf213
	rnu6
	rplp1
	rps18-ps2
	sel1l3
	serpine1a
	shank3
	shisa2
	slbp
	slc31a1
	slc38a2
	slfn9
	slxl1
	smarca5
	spns2
	spns3
	stag1
	tc2n
	tekt2
	thsd7b
	tktl1
	tmem117
	tmem135
	tuba1b/c
	tyw1
	u1
	u6
	v1r903
	vmn1r90
	vps13d
	vwa3b
	wdr93
	wnt5b
	tbx2

## Sheet: Cytoscape (Bingo)
Go-ID	Description	p-Value	Corrected p-Value	Cluster Freq	Total Freq	Genes
7275	multicellular organismal development	0.00066632	0.19751	21/107 19.6%	2661/28958 9.1%	IBSP DNM3 NAT8 WNT5B TBX2 ALMS1 SHISA MEPE FZD4 FLNB SHANK3 INHBA 1 SHISA2 SMARCA5 CLDN1 CDK11B ASPH GAPDH COL8A2 COL10A1
32502	developmental process	0.00067292	0.19751	22/107 20.5%	2856/28958 9.8%	IBSP DNM3 NAT8 WNT5B TBX2 ALMS1 SHISA MEPE FZD4 FLNB SHANK3 PEX11A INHBA 1 SHISA2 SMARCA5 CLDN1 CDK11B ASPH GAPDH COL8A2 COL10A1
6869	lipid transport	0.00094806	0.19751	4/107 3.7%	117/28958 0.4%	SPNS2 SPNS3 OSBPL9 ATP8A2
10876	lipid localization	0.0012117	0.19751	4/107 3.7%	125/28958 0.4%	SPNS2 SPNS3 OSBPL9 ATP8A2
16192	vesicle-mediated transport	0.0022158	0.22503	7/107 6.5%	486/28958 1.6%	ACR DNM3 DENND1A FKBP15 ERC1 UNC13B FLNA
16559	peroxisome fission	0.003695	0.22503	1/107 0.9%	1/28958 0.0%	PEX11A
42264	peptidyl-aspartic acid hydroxylation	0.003695	0.22503	1/107 0.9%	1/28958 0.0%	ASPH
18197	peptidyl-aspartic acid modification	0.003695	0.22503	1/107 0.9%	1/28958 0.0%	ASPH
16197	endosome transport	0.0041486	0.22503	2/107 1.8%	26/28958 0.0%	ERC1 FLNA
46058	cAMP metabolic process	0.0041486	0.22503	2/107 1.8%	26/28958 0.0%	ADCY2 PDE4B
50673	epithelial cell proliferation	0.004802	0.22503	2/107 1.8%	28/28958 0.0%	ALMS1 COL8A2
9987	cellular process	0.0052117	0.22503	46/107 42.9%	8929/28958 30.8%	IBSP ACR GNA14 ADCY2 WNT5B SLC38A2 A730011L01RIK EPT1 TYW1 PDE4B RPLP1 TEKT2 MLXIP CNTNAP1 ASPH ARNTL2 COL8A2 INPP5A STAG1 DNM3 PGAP2 SPNS2 SPNS3 TBX2 NCF4 DENND1A ALMS1 MID1 FLNA SLBP GAK PEX11A MAST4 INHBA 1 HIPK3 ATP8A2 CLDN1 SMARCA5 FKBP15 CDK11B ERC1 COL24A1 UNC13B EIF2C3 PLA2G4E
45598	regulation of fat cell differentiation	0.0054997	0.22503	2/107 1.8%	30/28958 0.1%	WNT5B ALMS1
7162	negative regulation of cell adhesion	0.0058648	0.22503	2/107 1.8%	31/28958 0.1%	NAT8 CML3
48489	synaptic vesicle transport	0.0070249	0.22503	2/107 1.8%	34/28958 0.1%	DENND1A UNC13B
16557	peroxisome membrane biogenesis	0.0073765	0.22503	1/107 0.9%	2/28958 0.0%	PEX11A
7521	muscle cell fate determination	0.0073765	0.22503	1/107 0.9%	2/28958 0.0%	TBX2
16082	synaptic vesicle priming	0.0073765	0.22503	1/107 0.9%	2/28958 0.0%	UNC13B
51799	negative regulation of hair follicle development	0.0073765	0.22503	1/107 0.9%	2/28958 0.0%	INHBA
30155	regulation of cell adhesion	0.0098496	0.22503	3/107 2.8%	119/28958 0.4%	NAT8 EMID2 CML3
9887	organ morphogenesis	0.010032	0.22503	7/107 6.5%	644/28958 2.2%	INHBA WNT5B TBX2 ALMS1 COL8A2 SHANK3 COL10A1
183	chromatin silencing at rDNA	0.011044	0.22503	1/107 0.9%	3/28958 0.0%	SMARCA5
30502	negative regulation of bone mineralization	0.011044	0.22503	1/107 0.9%	3/28958 0.0%	MEPE
6398	histone mRNA 3'-end processing	0.011044	0.22503	1/107 0.9%	3/28958 0.0%	SLBP
18126	protein amino acid hydroxylation	0.011044	0.22503	1/107 0.9%	3/28958 0.0%	ASPH
8334	histone mRNA metabolic process	0.011044	0.22503	1/107 0.9%	3/28958 0.0%	SLBP
8355	olfactory learning	0.011044	0.22503	1/107 0.9%	3/28958 0.0%	MUP20
60596	mammary placode formation	0.011044	0.22503	1/107 0.9%	3/28958 0.0%	TBX2
42147	retrograde transport, endosome to Golgi	0.011044	0.22503	1/107 0.9%	3/28958 0.0%	ERC1
44091	membrane biogenesis	0.011044	0.22503	1/107 0.9%	3/28958 0.0%	PEX11A
9187	cyclic nucleotide metabolic process	0.012593	0.24881	2/107 1.8%	46/28958 0.1%	ADCY2 PDE4B
70168	negative regulation of biomineral formation	0.014699	0.25442	1/107 0.9%	4/28958 0.0%	MEPE
42693	muscle cell fate commitment	0.014699	0.25442	1/107 0.9%	4/28958 0.0%	TBX2
43044	ATP-dependent chromatin remodeling	0.014699	0.25442	1/107 0.9%	4/28958 0.0%	SMARCA5
48519	negative regulation of biological process	0.016869	0.25442	12/107 11.2%	1625/28958 5.6%	NAT8 INHBA PGAP2 WNT5B TBX2 HIPK3 SMARCA5 ASPH MID1 MEPE CML3 EIF2C3
16458	gene silencing	0.017082	0.25442	2/107 1.8%	54/28958 0.1%	SMARCA5 EIF2C3
44238	primary metabolic process	0.018004	0.25442	30/107 28.0%	5588/28958 19.2%	ACR GNA14 ADCY2 A730011L01RIK EPT1 MIPEP PLIN1 TYW1 PDE4B RPLP1 MLXIP ARNTL2 ASPH DPP6 INPP5A PGAP2 TBX2 OSBPL9 ALMS1 MID1 SLBP GAK MAST4 1 HIPK3 ATP8A2 SMARCA5 FKBP15 CDK11B PLA2G4E
6163	purine nucleotide metabolic process	0.018052	0.25442	4/107 3.7%	270/28958 0.9%	GNA14 ADCY2 PDE4B ATP8A2
45683	negative regulation of epidermis development	0.01834	0.25442	1/107 0.9%	5/28958 0.0%	INHBA
45022	early endosome to late endosome transport	0.01834	0.25442	1/107 0.9%	5/28958 0.0%	FLNA
46855	inositol phosphate dephosphorylation	0.01834	0.25442	1/107 0.9%	5/28958 0.0%	INPP5A
1678	cellular glucose homeostasis	0.01834	0.25442	1/107 0.9%	5/28958 0.0%	ALMS1
46548	retinal rod cell development	0.01834	0.25442	1/107 0.9%	5/28958 0.0%	ALMS1
16338	calcium-independent cell-cell adhesion	0.021968	0.26524	1/107 0.9%	6/28958 0.0%	CLDN1
46838	phosphorylated carbohydrate dephosphorylation	0.021968	0.26524	1/107 0.9%	6/28958 0.0%	INPP5A
7341	penetration of zona pellucida	0.021968	0.26524	1/107 0.9%	6/28958 0.0%	ACR
42634	regulation of hair cycle	0.021968	0.26524	1/107 0.9%	6/28958 0.0%	INHBA
43508	negative regulation of JUN kinase activity	0.021968	0.26524	1/107 0.9%	6/28958 0.0%	HIPK3
42048	olfactory behavior	0.021968	0.26524	1/107 0.9%	6/28958 0.0%	MUP20
51797	regulation of hair follicle development	0.021968	0.26524	1/107 0.9%	6/28958 0.0%	INHBA
6974	response to DNA damage stimulus	0.022766	0.26567	4/107 3.7%	290/28958 1.0%	PGAP2 A730011L01RIK SMARCA5 MID1
45444	fat cell differentiation	0.022819	0.26567	2/107 1.8%	63/28958 0.2%	PEX11A ALMS1
32501	multicellular organismal process	0.02483	0.28238	25/107 23.3%	4555/28958 15.7%	ACR IBSP WNT5B SHISA OLFR656 SHISA2 ASPH COL8A2 GAPDH COL10A1 NAT8 DNM3 TBX2 ALMS1 MEPE FLNB FZD4 SHANK3 INHBA 1 MUP20 SMARCA5 CLDN1 CDK11B UNC13B
6644	phospholipid metabolic process	0.025681	0.28238	3/107 2.8%	171/28958 0.5%	PGAP2 EPT1 PLA2G4E
8152	metabolic process	0.025986	0.28238	33/107 30.8%	6472/28958 22.3%	ACR GNA14 ADCY2 A730011L01RIK EPT1 MIPEP TKTL1 PLIN1 TYW1 PDE4B RPLP1 MLXIP ARNTL2 ASPH DPP6 GAPDH INPP5A NAT8 PGAP2 TBX2 OSBPL9 ALMS1 MID1 SLBP GAK MAST4 1 HIPK3 ATP8A2 SMARCA5 FKBP15 CDK11B PLA2G4E
48856	anatomical structure development	0.027188	0.2883	15/107 14.0%	2363/28958 8.1%	IBSP DNM3 NAT8 WNT5B TBX2 ALMS1 MEPE FLNB SHANK3 INHBA CLDN1 CDK11B ASPH COL8A2 COL10A1
9123	nucleoside monophosphate metabolic process	0.028488	0.2883	2/107 1.8%	71/28958 0.2%	ADCY2 PDE4B
30031	cell projection assembly	0.028488	0.2883	2/107 1.8%	71/28958 0.2%	DNM3 ALMS1
7635	chemosensory behavior	0.029184	0.2883	1/107 0.9%	8/28958 0.0%	MUP20
48333	mesodermal cell differentiation	0.029184	0.2883	1/107 0.9%	8/28958 0.0%	INHBA
60592	mammary gland formation	0.029184	0.2883	1/107 0.9%	8/28958 0.0%	TBX2
19637	organophosphate metabolic process	0.03139	0.30338	3/107 2.8%	185/28958 0.6%	PGAP2 EPT1 PLA2G4E
9653	anatomical structure morphogenesis	0.031641	0.30338	9/107 8.4%	1186/28958 4.0%	NAT8 INHBA WNT5B TBX2 ALMS1 ASPH COL8A2 SHANK3 COL10A1
1539	ciliary or flagellar motility	0.032772	0.30967	1/107 0.9%	9/28958 0.0%	TEKT2
48592	eye morphogenesis	0.033859	0.31538	2/107 1.8%	78/28958 0.2%	ALMS1 COL8A2
7369	gastrulation	0.037092	0.32028	2/107 1.8%	82/28958 0.2%	NAT8 INHBA
10324	membrane invagination	0.038661	0.32028	3/107 2.8%	201/28958 0.6%	DNM3 DENND1A FKBP15
6897	endocytosis	0.038661	0.32028	3/107 2.8%	201/28958 0.6%	DNM3 DENND1A FKBP15
46847	filopodium assembly	0.039909	0.32028	1/107 0.9%	11/28958 0.0%	DNM3
60788	ectodermal placode formation	0.039909	0.32028	1/107 0.9%	11/28958 0.0%	TBX2
71697	ectodermal placode morphogenesis	0.039909	0.32028	1/107 0.9%	11/28958 0.0%	TBX2
71696	ectodermal placode development	0.039909	0.32028	1/107 0.9%	11/28958 0.0%	TBX2
45600	positive regulation of fat cell differentiation	0.043458	0.32028	1/107 0.9%	12/28958 0.0%	WNT5B
7340	acrosome reaction	0.043458	0.32028	1/107 0.9%	12/28958 0.0%	ACR
6198	cAMP catabolic process	0.043458	0.32028	1/107 0.9%	12/28958 0.0%	PDE4B
30035	microspike assembly	0.043458	0.32028	1/107 0.9%	12/28958 0.0%	DNM3
31124	mRNA 3'-end processing	0.043458	0.32028	1/107 0.9%	12/28958 0.0%	SLBP
9790	embryonic development	0.04354	0.32028	6/107 5.6%	692/28958 2.3%	NAT8 INHBA 1 SMARCA5 CDK11B SHANK3
8654	phospholipid biosynthetic process	0.045662	0.32028	2/107 1.8%	92/28958 0.3%	PGAP2 EPT1
9117	nucleotide metabolic process	0.045905	0.32028	4/107 3.7%	363/28958 1.2%	GNA14 ADCY2 PDE4B ATP8A2
6753	nucleoside phosphate metabolic process	0.045905	0.32028	4/107 3.7%	363/28958 1.2%	GNA14 ADCY2 PDE4B ATP8A2
6629	lipid metabolic process	0.046379	0.32028	6/107 5.6%	703/28958 2.4%	PGAP2 PLIN1 OSBPL9 ALMS1 EPT1 PLA2G4E
60325	face morphogenesis	0.046994	0.32028	1/107 0.9%	13/28958 0.0%	ASPH
71363	cellular response to growth factor stimulus	0.046994	0.32028	1/107 0.9%	13/28958 0.0%	IBSP
6171	cAMP biosynthetic process	0.046994	0.32028	1/107 0.9%	13/28958 0.0%	ADCY2
30279	negative regulation of ossification	0.046994	0.32028	1/107 0.9%	13/28958 0.0%	MEPE
31114	regulation of microtubule depolymerization	0.046994	0.32028	1/107 0.9%	13/28958 0.0%	MID1
7026	negative regulation of microtubule depolymerization	0.046994	0.32028	1/107 0.9%	13/28958 0.0%	MID1
70848	response to growth factor stimulus	0.046994	0.32028	1/107 0.9%	13/28958 0.0%	IBSP
48488	synaptic vesicle endocytosis	0.046994	0.32028	1/107 0.9%	13/28958 0.0%	DENND1A
9888	tissue development	0.047975	0.32028	6/107 5.6%	709/28958 2.4%	IBSP INHBA TBX2 FLNB SHANK3 COL10A1
6810	transport	0.047985	0.32028	14/107 13.0%	2330/28958 8.0%	ACR DNM3 SPNS2 SLC38A2 SPNS3 OSBPL9 DENND1A FLNA ATP8A2 FKBP15 MLXIP ERC1 UNC13B SLC31A1
2244	hemopoietic progenitor cell differentiation	0.050517	0.32028	1/107 0.9%	14/28958 0.0%	INHBA
6471	protein amino acid ADP-ribosylation	0.050517	0.32028	1/107 0.9%	14/28958 0.0%	GNA14
9214	cyclic nucleotide catabolic process	0.050517	0.32028	1/107 0.9%	14/28958 0.0%	PDE4B
51234	establishment of localization	0.050741	0.32028	14/107 13.0%	2349/28958 8.1%	ACR DNM3 SPNS2 SLC38A2 SPNS3 OSBPL9 DENND1A FLNA ATP8A2 FKBP15 MLXIP ERC1 UNC13B SLC31A1
7154	cell communication	0.050858	0.32028	5/107 4.6%	542/28958 1.8%	WNT5B NCF4 CLDN1 CNTNAP1 UNC13B
22610	biological adhesion	0.051186	0.32028	5/107 4.6%	543/28958 1.8%	IBSP CLDN1 CNTNAP1 COL24A1 COL8A2
7155	cell adhesion	0.051186	0.32028	5/107 4.6%	543/28958 1.8%	IBSP CLDN1 CNTNAP1 COL24A1 COL8A2
6281	DNA repair	0.051579	0.32028	3/107 2.8%	226/28958 0.7%	A730011L01RIK SMARCA5 MID1
6825	copper ion transport	0.054027	0.32339	1/107 0.9%	15/28958 0.0%	SLC31A1
90090	negative regulation of canonical Wnt receptor signaling pathway	0.057524	0.32339	1/107 0.9%	16/28958 0.0%	WNT5B
6284	base-excision repair	0.057524	0.32339	1/107 0.9%	16/28958 0.0%	MID1
19722	calcium-mediated signaling	0.057524	0.32339	1/107 0.9%	16/28958 0.0%	ALMS1
31111	negative regulation of microtubule polymerization or depolymerization	0.057524	0.32339	1/107 0.9%	16/28958 0.0%	MID1
7031	peroxisome organization	0.057524	0.32339	1/107 0.9%	16/28958 0.0%	PEX11A
55086	nucleobase, nucleoside and nucleotide metabolic process	0.059487	0.32339	4/107 3.7%	396/28958 1.3%	GNA14 ADCY2 PDE4B ATP8A2
48646	anatomical structure formation involved in morphogenesis	0.060818	0.32339	4/107 3.7%	399/28958 1.3%	INHBA TBX2 COL8A2 SHANK3
30500	regulation of bone mineralization	0.061009	0.32339	1/107 0.9%	17/28958 0.0%	MEPE
60323	head morphogenesis	0.061009	0.32339	1/107 0.9%	17/28958 0.0%	ASPH
60324	face development	0.061009	0.32339	1/107 0.9%	17/28958 0.0%	ASPH
7339	binding of sperm to zona pellucida	0.061009	0.32339	1/107 0.9%	17/28958 0.0%	ACR
18107	peptidyl-threonine phosphorylation	0.061009	0.32339	1/107 0.9%	17/28958 0.0%	HIPK3
18210	peptidyl-threonine modification	0.061009	0.32339	1/107 0.9%	17/28958 0.0%	HIPK3
51179	localization	0.064341	0.32339	15/107 14.0%	2657/28958 9.1%	ACR DNM3 SPNS2 SLC38A2 SPNS3 OSBPL9 DENND1A FLNA ATP8A2 FKBP15 TEKT2 MLXIP ERC1 UNC13B SLC31A1
46483	heterocycle metabolic process	0.064443	0.32339	4/107 3.7%	407/28958 1.4%	GNA14 ADCY2 PDE4B ATP8A2
70167	regulation of biomineral formation	0.06448	0.32339	1/107 0.9%	18/28958 0.0%	MEPE
7416	synapse assembly	0.06448	0.32339	1/107 0.9%	18/28958 0.0%	DNM3
35036	sperm-egg recognition	0.06448	0.32339	1/107 0.9%	18/28958 0.0%	ACR
16079	synaptic vesicle exocytosis	0.06448	0.32339	1/107 0.9%	18/28958 0.0%	UNC13B
9125	nucleoside monophosphate catabolic process	0.06448	0.32339	1/107 0.9%	18/28958 0.0%	PDE4B
9395	phospholipid catabolic process	0.06448	0.32339	1/107 0.9%	18/28958 0.0%	PLA2G4E
31123	RNA 3'-end processing	0.06448	0.32339	1/107 0.9%	18/28958 0.0%	SLBP
1958	endochondral ossification	0.06448	0.32339	1/107 0.9%	18/28958 0.0%	COL10A1
45682	regulation of epidermis development	0.067939	0.33305	1/107 0.9%	19/28958 0.0%	INHBA
35176	social behavior	0.067939	0.33305	1/107 0.9%	19/28958 0.0%	NLGN4
6020	inositol metabolic process	0.067939	0.33305	1/107 0.9%	19/28958 0.0%	INPP5A
1503	ossification	0.0698	0.33484	2/107 1.8%	117/28958 0.4%	IBSP COL10A1
6887	exocytosis	0.0698	0.33484	2/107 1.8%	117/28958 0.4%	ACR UNC13B
9988	cell-cell recognition	0.071385	0.33484	1/107 0.9%	20/28958 0.0%	ACR
6342	chromatin silencing	0.071385	0.33484	1/107 0.9%	20/28958 0.0%	SMARCA5
7223	Wnt receptor signaling pathway, calcium modulating pathway	0.071385	0.33484	1/107 0.9%	20/28958 0.0%	WNT5B
7212	dopamine receptor signaling pathway	0.071385	0.33484	1/107 0.9%	20/28958 0.0%	NSG2
51649	establishment of localization in cell	0.071935	0.33501	5/107 4.6%	600/28958 2.0%	ACR MLXIP ERC1 UNC13B FLNA
42462	eye photoreceptor cell development	0.074819	0.34597	1/107 0.9%	21/28958 0.0%	ALMS1
33554	cellular response to stress	0.077494	0.35425	4/107 3.7%	434/28958 1.4%	PGAP2 A730011L01RIK SMARCA5 MID1
45814	negative regulation of gene expression, epigenetic	0.07824	0.35425	1/107 0.9%	22/28958 0.0%	SMARCA5
31110	regulation of microtubule polymerization or depolymerization	0.07824	0.35425	1/107 0.9%	22/28958 0.0%	MID1
60322	head development	0.081648	0.35719	1/107 0.9%	23/28958 0.0%	ASPH
10171	body morphogenesis	0.081648	0.35719	1/107 0.9%	23/28958 0.0%	ASPH
35567	non-canonical Wnt receptor signaling pathway	0.081648	0.35719	1/107 0.9%	23/28958 0.0%	WNT5B
6164	purine nucleotide biosynthetic process	0.083667	0.35719	2/107 1.8%	130/28958 0.4%	ADCY2 ATP8A2
14706	striated muscle tissue development	0.083667	0.35719	2/107 1.8%	130/28958 0.4%	TBX2 FLNB
15914	phospholipid transport	0.085044	0.35719	1/107 0.9%	24/28958 0.0%	ATP8A2
1754	eye photoreceptor cell differentiation	0.085044	0.35719	1/107 0.9%	24/28958 0.0%	ALMS1
17156	calcium ion-dependent exocytosis	0.085044	0.35719	1/107 0.9%	24/28958 0.0%	ACR
48523	negative regulation of cellular process	0.085622	0.35719	9/107 8.4%	1441/28958 4.9%	NAT8 PGAP2 WNT5B TBX2 HIPK3 SMARCA5 ASPH MID1 CML3
42384	cilium assembly	0.088428	0.35719	1/107 0.9%	25/28958 0.0%	ALMS1
60828	regulation of canonical Wnt receptor signaling pathway	0.088428	0.35719	1/107 0.9%	25/28958 0.0%	WNT5B
42461	photoreceptor cell development	0.091799	0.35719	1/107 0.9%	26/28958 0.0%	ALMS1
60348	bone development	0.092583	0.35719	2/107 1.8%	138/28958 0.4%	IBSP COL10A1
44085	cellular component biogenesis	0.093887	0.35719	5/107 4.6%	651/28958 2.2%	PEX11A DNM3 ALMS1 UNC13B SHANK3
16044	cellular membrane organization	0.094842	0.35719	3/107 2.8%	293/28958 1.0%	DNM3 DENND1A FKBP15
61024	membrane organization	0.094842	0.35719	3/107 2.8%	293/28958 1.0%	DNM3 DENND1A FKBP15
16042	lipid catabolic process	0.094854	0.35719	2/107 1.8%	140/28958 0.4%	PLIN1 PLA2G4E
46486	glycerolipid metabolic process	0.094854	0.35719	2/107 1.8%	140/28958 0.4%	PGAP2 ALMS1
7569	cell aging	0.095158	0.35719	1/107 0.9%	27/28958 0.0%	TBX2
60350	endochondral bone morphogenesis	0.095158	0.35719	1/107 0.9%	27/28958 0.0%	COL10A1
6302	double-strand break repair	0.095158	0.35719	1/107 0.9%	27/28958 0.0%	SMARCA5
9190	cyclic nucleotide biosynthetic process	0.095158	0.35719	1/107 0.9%	27/28958 0.0%	ADCY2
43407	negative regulation of MAP kinase activity	0.095158	0.35719	1/107 0.9%	27/28958 0.0%	HIPK3
1702	gastrulation with mouth forming second	0.095158	0.35719	1/107 0.9%	27/28958 0.0%	NAT8
1709	cell fate determination	0.095158	0.35719	1/107 0.9%	27/28958 0.0%	TBX2
19538	protein metabolic process	0.095653	0.35719	12/107 11.2%	2136/28958 7.3%	ACR MAST4 PGAP2 GNA14 HIPK3 RPLP1 FKBP15 CDK11B ASPH MIPEP DPP6 GAK
16055	Wnt receptor signaling pathway	0.095996	0.35719	2/107 1.8%	141/28958 0.4%	WNT5B FZD4
60537	muscle tissue development	0.095996	0.35719	2/107 1.8%	141/28958 0.4%	TBX2 FLNB
51641	cellular localization	0.097143	0.35719	5/107 4.6%	658/28958 2.2%	ACR MLXIP ERC1 UNC13B FLNA
44271	cellular nitrogen compound biosynthetic process	0.097786	0.35719	3/107 2.8%	297/28958 1.0%	1 ADCY2 ATP8A2
42632	cholesterol homeostasis	0.098505	0.35719	1/107 0.9%	28/28958 0.0%	ALMS1
55092	sterol homeostasis	0.098505	0.35719	1/107 0.9%	28/28958 0.0%	ALMS1
60271	cilium morphogenesis	0.098505	0.35719	1/107 0.9%	28/28958 0.0%	ALMS1
48731	system development	0.099433	0.35719	12/107 11.2%	2151/28958 7.4%	IBSP DNM3 INHBA WNT5B TBX2 CLDN1 ALMS1 MEPE COL8A2 FLNB SHANK3 COL10A1
18193	peptidyl-amino acid modification	0.099444	0.35719	2/107 1.8%	144/28958 0.4%	HIPK3 ASPH
19932	second-messenger-mediated signaling	0.1006	0.35719	2/107 1.8%	145/28958 0.5%	ADCY2 ALMS1
6506	GPI anchor biosynthetic process	0.10184	0.35719	1/107 0.9%	29/28958 0.1%	PGAP2
31047	gene silencing by RNA	0.10184	0.35719	1/107 0.9%	29/28958 0.1%	EIF2C3
43506	regulation of JUN kinase activity	0.10184	0.35719	1/107 0.9%	29/28958 0.1%	HIPK3
46530	photoreceptor cell differentiation	0.10184	0.35719	1/107 0.9%	29/28958 0.1%	ALMS1
10629	negative regulation of gene expression	0.10368	0.35719	4/107 3.7%	482/28958 1.6%	TBX2 HIPK3 SMARCA5 EIF2C3
51241	negative regulation of multicellular organismal process	0.10409	0.35719	2/107 1.8%	148/28958 0.5%	INHBA MEPE
6338	chromatin remodeling	0.10516	0.35719	1/107 0.9%	30/28958 0.1%	SMARCA5
50873	brown fat cell differentiation	0.10516	0.35719	1/107 0.9%	30/28958 0.1%	PEX11A
1501	skeletal system development	0.10531	0.35719	3/107 2.8%	307/28958 1.0%	IBSP MEPE COL10A1
70507	regulation of microtubule cytoskeleton organization	0.10847	0.35719	1/107 0.9%	31/28958 0.1%	MID1
6505	GPI anchor metabolic process	0.10847	0.35719	1/107 0.9%	31/28958 0.1%	PGAP2
60070	canonical Wnt receptor signaling pathway	0.10847	0.35719	1/107 0.9%	31/28958 0.1%	FZD4
30317	sperm motility	0.10847	0.35719	1/107 0.9%	31/28958 0.1%	TEKT2
7088	regulation of mitosis	0.10847	0.35719	1/107 0.9%	31/28958 0.1%	CDK11B
18105	peptidyl-serine phosphorylation	0.10847	0.35719	1/107 0.9%	31/28958 0.1%	HIPK3
51783	regulation of nuclear division	0.10847	0.35719	1/107 0.9%	31/28958 0.1%	CDK11B
46489	phosphoinositide biosynthetic process	0.10847	0.35719	1/107 0.9%	31/28958 0.1%	PGAP2
44255	cellular lipid metabolic process	0.11019	0.36103	4/107 3.7%	493/28958 1.7%	PGAP2 ALMS1 EPT1 PLA2G4E
32012	regulation of ARF protein signal transduction	0.11177	0.36255	1/107 0.9%	32/28958 0.1%	IQSEC3
43242	negative regulation of protein complex disassembly	0.11177	0.36255	1/107 0.9%	32/28958 0.1%	MID1
16043	cellular component organization	0.11406	0.36816	11/107 10.2%	1979/28958 6.8%	PEX11A IBSP DNM3 DENND1A SMARCA5 TEKT2 FKBP15 ALMS1 UNC13B SHANK3 STAG1
51716	cellular response to stimulus	0.11529	0.37028	5/107 4.6%	695/28958 2.4%	IBSP PGAP2 A730011L01RIK SMARCA5 MID1
33043	regulation of organelle organization	0.11839	0.37653	2/107 1.8%	160/28958 0.5%	CDK11B MID1
43062	extracellular structure organization	0.11839	0.37653	2/107 1.8%	160/28958 0.5%	IBSP DNM3
6195	purine nucleotide catabolic process	0.12082	0.38239	2/107 1.8%	162/28958 0.5%	GNA14 PDE4B
9165	nucleotide biosynthetic process	0.12326	0.38576	2/107 1.8%	164/28958 0.5%	ADCY2 ATP8A2
1654	eye development	0.12448	0.38576	2/107 1.8%	165/28958 0.5%	ALMS1 COL8A2
44237	cellular metabolic process	0.1247	0.38576	25/107 23.3%	5372/28958 18.5%	GNA14 ADCY2 A730011L01RIK EPT1 TYW1 PDE4B RPLP1 MLXIP ARNTL2 ASPH INPP5A PGAP2 TBX2 ALMS1 MID1 GAK SLBP MAST4 1 HIPK3 SMARCA5 ATP8A2 FKBP15 CDK11B PLA2G4E
10811	positive regulation of cell-substrate adhesion	0.12484	0.38576	1/107 0.9%	36/28958 0.1%	EMID2
31214	biomineral formation	0.12484	0.38576	1/107 0.9%	36/28958 0.1%	IBSP
34654	nucleobase, nucleoside, nucleotide and nucleic acid biosynthetic process	0.13065	0.3992	2/107 1.8%	170/28958 0.5%	ADCY2 ATP8A2
34404	nucleobase, nucleoside and nucleotide biosynthetic process	0.13065	0.3992	2/107 1.8%	170/28958 0.5%	ADCY2 ATP8A2
51705	behavioral interaction between organisms	0.1313	0.3992	1/107 0.9%	38/28958 0.1%	NLGN4
45892	negative regulation of transcription, DNA-dependent	0.13164	0.3992	3/107 2.8%	340/28958 1.1%	TBX2 HIPK3 SMARCA5
51253	negative regulation of RNA metabolic process	0.13414	0.40119	3/107 2.8%	343/28958 1.1%	TBX2 HIPK3 SMARCA5
30178	negative regulation of Wnt receptor signaling pathway	0.13452	0.40119	1/107 0.9%	39/28958 0.1%	WNT5B
60443	mammary gland morphogenesis	0.13452	0.40119	1/107 0.9%	39/28958 0.1%	TBX2
6414	translational elongation	0.13772	0.40119	1/107 0.9%	40/28958 0.1%	RPLP1
60349	bone morphogenesis	0.13772	0.40119	1/107 0.9%	40/28958 0.1%	COL10A1
32886	regulation of microtubule-based process	0.13772	0.40119	1/107 0.9%	40/28958 0.1%	MID1
18209	peptidyl-serine modification	0.13772	0.40119	1/107 0.9%	40/28958 0.1%	HIPK3
55088	lipid homeostasis	0.13772	0.40119	1/107 0.9%	40/28958 0.1%	ALMS1
9166	nucleotide catabolic process	0.1394	0.40119	2/107 1.8%	177/28958 0.6%	GNA14 PDE4B
42770	DNA damage response, signal transduction	0.14091	0.40119	1/107 0.9%	41/28958 0.1%	PGAP2
6641	triglyceride metabolic process	0.14091	0.40119	1/107 0.9%	41/28958 0.1%	ALMS1
60021	palate development	0.14091	0.40119	1/107 0.9%	41/28958 0.1%	ASPH
42552	myelination	0.14091	0.40119	1/107 0.9%	41/28958 0.1%	CLDN1
7269	neurotransmitter secretion	0.14091	0.40119	1/107 0.9%	41/28958 0.1%	UNC13B
7517	muscle organ development	0.14573	0.40862	2/107 1.8%	182/28958 0.6%	TBX2 FLNB
3333	amino acid transmembrane transport	0.14726	0.40862	1/107 0.9%	43/28958 0.1%	SLC38A2
1707	mesoderm formation	0.14726	0.40862	1/107 0.9%	43/28958 0.1%	INHBA
43244	regulation of protein complex disassembly	0.14726	0.40862	1/107 0.9%	43/28958 0.1%	MID1
22607	cellular component assembly	0.14805	0.40862	4/107 3.7%	552/28958 1.9%	DNM3 ALMS1 UNC13B SHANK3
48610	reproductive cellular process	0.14956	0.40862	2/107 1.8%	185/28958 0.6%	ACR ALMS1
7338	single fertilization	0.15041	0.40862	1/107 0.9%	44/28958 0.1%	ACR
19751	polyol metabolic process	0.15041	0.40862	1/107 0.9%	44/28958 0.1%	INPP5A
7272	ensheathment of neurons	0.15041	0.40862	1/107 0.9%	44/28958 0.1%	CLDN1
48332	mesoderm morphogenesis	0.15041	0.40862	1/107 0.9%	44/28958 0.1%	INHBA
8366	axon ensheathment	0.15041	0.40862	1/107 0.9%	44/28958 0.1%	CLDN1
6464	protein modification process	0.15187	0.40864	7/107 6.5%	1191/28958 4.1%	MAST4 PGAP2 GNA14 HIPK3 CDK11B ASPH GAK
34656	nucleobase, nucleoside and nucleotide catabolic process	0.1534	0.40864	2/107 1.8%	188/28958 0.6%	GNA14 PDE4B
34655	nucleobase, nucleoside, nucleotide and nucleic acid catabolic process	0.1534	0.40864	2/107 1.8%	188/28958 0.6%	GNA14 PDE4B
42593	glucose homeostasis	0.15356	0.40864	1/107 0.9%	45/28958 0.1%	ALMS1
33500	carbohydrate homeostasis	0.15356	0.40864	1/107 0.9%	45/28958 0.1%	ALMS1
51494	negative regulation of cytoskeleton organization	0.15669	0.41294	1/107 0.9%	46/28958 0.1%	MID1
9124	nucleoside monophosphate biosynthetic process	0.15981	0.41294	1/107 0.9%	47/28958 0.1%	ADCY2
46474	glycerophospholipid biosynthetic process	0.15981	0.41294	1/107 0.9%	47/28958 0.1%	PGAP2
44270	cellular nitrogen compound catabolic process	0.16115	0.41294	2/107 1.8%	194/28958 0.6%	GNA14 PDE4B
6639	acylglycerol metabolic process	0.16292	0.41294	1/107 0.9%	48/28958 0.1%	ALMS1
8306	associative learning	0.16292	0.41294	1/107 0.9%	48/28958 0.1%	MUP20
42398	cellular amino acid derivative biosynthetic process	0.16292	0.41294	1/107 0.9%	48/28958 0.1%	1
1704	formation of primary germ layer	0.16292	0.41294	1/107 0.9%	48/28958 0.1%	INHBA
48285	organelle fission	0.16375	0.41294	2/107 1.8%	196/28958 0.6%	PEX11A STAG1
44267	cellular protein metabolic process	0.16529	0.41294	9/107 8.4%	1672/28958 5.7%	MAST4 PGAP2 GNA14 HIPK3 RPLP1 FKBP15 CDK11B ASPH GAK
30030	cell projection organization	0.16536	0.41294	3/107 2.8%	379/28958 1.3%	DNM3 TEKT2 ALMS1
7190	activation of adenylate cyclase activity	0.16602	0.41294	1/107 0.9%	49/28958 0.1%	ADCY2
9205	purine ribonucleoside triphosphate metabolic process	0.16636	0.41294	2/107 1.8%	198/28958 0.6%	GNA14 ATP8A2
9199	ribonucleoside triphosphate metabolic process	0.16766	0.41294	2/107 1.8%	199/28958 0.6%	GNA14 ATP8A2
48513	organ development	0.16855	0.41294	9/107 8.4%	1680/28958 5.8%	IBSP INHBA WNT5B TBX2 ALMS1 COL8A2 FLNB SHANK3 COL10A1
43687	post-translational protein modification	0.16872	0.41294	6/107 5.6%	1006/28958 3.4%	MAST4 GNA14 HIPK3 CDK11B ASPH GAK
48598	embryonic morphogenesis	0.16896	0.41294	3/107 2.8%	383/28958 1.3%	NAT8 INHBA SHANK3
46700	heterocycle catabolic process	0.16897	0.41294	2/107 1.8%	200/28958 0.6%	GNA14 PDE4B
6638	neutral lipid metabolic process	0.1691	0.41294	1/107 0.9%	50/28958 0.1%	ALMS1
6497	protein amino acid lipidation	0.1691	0.41294	1/107 0.9%	50/28958 0.1%	PGAP2
7059	chromosome segregation	0.1691	0.41294	1/107 0.9%	50/28958 0.1%	STAG1
6662	glycerol ether metabolic process	0.1691	0.41294	1/107 0.9%	50/28958 0.1%	ALMS1
45762	positive regulation of adenylate cyclase activity	0.17218	0.417	1/107 0.9%	51/28958 0.1%	ADCY2
6259	DNA metabolic process	0.17258	0.417	3/107 2.8%	387/28958 1.3%	A730011L01RIK SMARCA5 MID1
9144	purine nucleoside triphosphate metabolic process	0.17422	0.417	2/107 1.8%	204/28958 0.7%	GNA14 ATP8A2
7623	circadian rhythm	0.17524	0.417	1/107 0.9%	52/28958 0.1%	ARNTL2
31281	positive regulation of cyclase activity	0.17524	0.417	1/107 0.9%	52/28958 0.1%	ADCY2
51349	positive regulation of lyase activity	0.17524	0.417	1/107 0.9%	52/28958 0.1%	ADCY2
18904	organic ether metabolic process	0.17524	0.417	1/107 0.9%	52/28958 0.1%	ALMS1
32940	secretion by cell	0.17685	0.41778	2/107 1.8%	206/28958 0.7%	ACR UNC13B
10810	regulation of cell-substrate adhesion	0.1783	0.41778	1/107 0.9%	53/28958 0.1%	EMID2
1824	blastocyst development	0.1783	0.41778	1/107 0.9%	53/28958 0.1%	CDK11B
48593	camera-type eye morphogenesis	0.1783	0.41778	1/107 0.9%	53/28958 0.1%	COL8A2
43412	macromolecule modification	0.1795	0.41778	7/107 6.5%	1249/28958 4.3%	MAST4 PGAP2 GNA14 HIPK3 CDK11B ASPH GAK
9141	nucleoside triphosphate metabolic process	0.18082	0.41778	2/107 1.8%	209/28958 0.7%	GNA14 ATP8A2
8037	cell recognition	0.18134	0.41778	1/107 0.9%	54/28958 0.1%	ACR
43388	positive regulation of DNA binding	0.18134	0.41778	1/107 0.9%	54/28958 0.1%	HIPK3
50808	synapse organization	0.18134	0.41778	1/107 0.9%	54/28958 0.1%	DNM3
40007	growth	0.18214	0.41816	2/107 1.8%	210/28958 0.7%	INHBA ALMS1
42158	lipoprotein biosynthetic process	0.18437	0.42178	1/107 0.9%	55/28958 0.1%	PGAP2
46328	regulation of JNK cascade	0.18739	0.42719	1/107 0.9%	56/28958 0.1%	HIPK3
10605	negative regulation of macromolecule metabolic process	0.18872	0.42844	4/107 3.7%	609/28958 2.1%	TBX2 HIPK3 SMARCA5 EIF2C3
43170	macromolecule metabolic process	0.18925	0.42844	20/107 18.6%	4402/28958 15.2%	ACR GNA14 PGAP2 A730011L01RIK TBX2 MIPEP MID1 SLBP GAK MAST4 TYW1 HIPK3 RPLP1 SMARCA5 FKBP15 MLXIP CDK11B ASPH ARNTL2 DPP6
6469	negative regulation of protein kinase activity	0.1904	0.42954	1/107 0.9%	57/28958 0.1%	HIPK3
9150	purine ribonucleotide metabolic process	0.19279	0.4304	2/107 1.8%	218/28958 0.7%	GNA14 ATP8A2
45017	glycerolipid biosynthetic process	0.19339	0.4304	1/107 0.9%	58/28958 0.2%	PGAP2
46907	intracellular transport	0.1938	0.4304	3/107 2.8%	410/28958 1.4%	MLXIP ERC1 FLNA
48738	cardiac muscle tissue development	0.19638	0.4304	1/107 0.9%	59/28958 0.2%	TBX2
70302	regulation of stress-activated protein kinase signaling cascade	0.19638	0.4304	1/107 0.9%	59/28958 0.2%	HIPK3
30111	regulation of Wnt receptor signaling pathway	0.19638	0.4304	1/107 0.9%	59/28958 0.2%	WNT5B
33673	negative regulation of kinase activity	0.19638	0.4304	1/107 0.9%	59/28958 0.2%	HIPK3
34641	cellular nitrogen compound metabolic process	0.19762	0.4304	14/107 13.0%	2947/28958 10.1%	GNA14 ADCY2 A730011L01RIK TBX2 MID1 SLBP 1 HIPK3 TYW1 PDE4B ATP8A2 SMARCA5 MLXIP ARNTL2
9259	ribonucleotide metabolic process	0.19814	0.4304	2/107 1.8%	222/28958 0.7%	GNA14 ATP8A2
44283	small molecule biosynthetic process	0.1985	0.4304	3/107 2.8%	415/28958 1.4%	1 ADCY2 ATP8A2
45785	positive regulation of cell adhesion	0.19936	0.4304	1/107 0.9%	60/28958 0.2%	EMID2
7286	spermatid development	0.19936	0.4304	1/107 0.9%	60/28958 0.2%	ALMS1
19228	regulation of action potential in neuron	0.19936	0.4304	1/107 0.9%	60/28958 0.2%	CLDN1
6468	protein amino acid phosphorylation	0.20074	0.43191	4/107 3.7%	625/28958 2.1%	MAST4 HIPK3 CDK11B GAK
61061	muscle structure development	0.20217	0.43191	2/107 1.8%	225/28958 0.7%	TBX2 FLNB
51099	positive regulation of binding	0.20232	0.43191	1/107 0.9%	61/28958 0.2%	HIPK3
6139	nucleobase, nucleoside, nucleotide and nucleic acid metabolic process	0.2027	0.43191	13/107 12.1%	2718/28958 9.3%	GNA14 ADCY2 A730011L01RIK TBX2 MID1 SLBP HIPK3 TYW1 PDE4B SMARCA5 ATP8A2 MLXIP ARNTL2
51348	negative regulation of transferase activity	0.20527	0.43313	1/107 0.9%	62/28958 0.2%	HIPK3
6184	GTP catabolic process	0.20527	0.43313	1/107 0.9%	62/28958 0.2%	GNA14
10639	negative regulation of organelle organization	0.20527	0.43313	1/107 0.9%	62/28958 0.2%	MID1
7568	aging	0.20822	0.43652	1/107 0.9%	63/28958 0.2%	TBX2
40029	regulation of gene expression, epigenetic	0.20822	0.43652	1/107 0.9%	63/28958 0.2%	SMARCA5
16481	negative regulation of transcription	0.20989	0.43861	3/107 2.8%	427/28958 1.4%	TBX2 HIPK3 SMARCA5
48515	spermatid differentiation	0.21115	0.43984	1/107 0.9%	64/28958 0.2%	ALMS1
41	transition metal ion transport	0.21407	0.44309	1/107 0.9%	65/28958 0.2%	SLC31A1
44242	cellular lipid catabolic process	0.21407	0.44309	1/107 0.9%	65/28958 0.2%	PLA2G4E
30384	phosphoinositide metabolic process	0.21988	0.45082	1/107 0.9%	67/28958 0.2%	PGAP2
1838	embryonic epithelial tube formation	0.21988	0.45082	1/107 0.9%	67/28958 0.2%	SHANK3
42157	lipoprotein metabolic process	0.21988	0.45082	1/107 0.9%	67/28958 0.2%	PGAP2
7498	mesoderm development	0.22277	0.45389	1/107 0.9%	68/28958 0.2%	INHBA
72175	epithelial tube formation	0.22277	0.45389	1/107 0.9%	68/28958 0.2%	SHANK3
7229	integrin-mediated signaling pathway	0.22565	0.45754	1/107 0.9%	69/28958 0.2%	IBSP
9892	negative regulation of metabolic process	0.22622	0.45754	4/107 3.7%	658/28958 2.2%	TBX2 HIPK3 SMARCA5 EIF2C3
6807	nitrogen compound metabolic process	0.22768	0.45754	14/107 13.0%	3032/28958 10.4%	GNA14 ADCY2 A730011L01RIK TBX2 MID1 SLBP 1 HIPK3 TYW1 PDE4B ATP8A2 SMARCA5 MLXIP ARNTL2
1505	regulation of neurotransmitter levels	0.22852	0.45754	1/107 0.9%	70/28958 0.2%	UNC13B
8033	tRNA processing	0.22852	0.45754	1/107 0.9%	70/28958 0.2%	TYW1
7612	learning	0.23137	0.45754	1/107 0.9%	71/28958 0.2%	MUP20
9566	fertilization	0.23137	0.45754	1/107 0.9%	71/28958 0.2%	ACR
44281	small molecule metabolic process	0.23222	0.45754	7/107 6.5%	1350/28958 4.6%	GNA14 1 ADCY2 PDE4B ATP8A2 ALMS1 INPP5A
7519	skeletal muscle tissue development	0.23422	0.45754	1/107 0.9%	72/28958 0.2%	FLNB
6333	chromatin assembly or disassembly	0.23422	0.45754	1/107 0.9%	72/28958 0.2%	SMARCA5
46039	GTP metabolic process	0.23422	0.45754	1/107 0.9%	72/28958 0.2%	GNA14
33036	macromolecule localization	0.23438	0.45754	5/107 4.6%	892/28958 3.0%	SPNS2 SPNS3 OSBPL9 ATP8A2 ERC1
23034	intracellular signaling pathway	0.23438	0.45754	5/107 4.6%	892/28958 3.0%	PGAP2 ADCY2 ALMS1 UNC13B SHANK3
30278	regulation of ossification	0.23706	0.46	1/107 0.9%	73/28958 0.2%	MEPE
6754	ATP biosynthetic process	0.23706	0.46	1/107 0.9%	73/28958 0.2%	ATP8A2
6357	regulation of transcription from RNA polymerase II promoter	0.23807	0.46001	4/107 3.7%	673/28958 2.3%	INHBA TBX2 HIPK3 ARNTL2
45934	negative regulation of nucleobase, nucleoside, nucleotide and nucleic acid metabolic process	0.23895	0.46001	3/107 2.8%	457/28958 1.5%	TBX2 HIPK3 SMARCA5
60538	skeletal muscle organ development	0.23988	0.46001	1/107 0.9%	74/28958 0.2%	FLNB
10564	regulation of cell cycle process	0.23988	0.46001	1/107 0.9%	74/28958 0.2%	CDK11B
8283	cell proliferation	0.24149	0.46174	2/107 1.8%	254/28958 0.8%	ALMS1 COL8A2
35148	tube formation	0.2427	0.46269	1/107 0.9%	75/28958 0.2%	SHANK3
46903	secretion	0.24695	0.46789	2/107 1.8%	258/28958 0.8%	ACR UNC13B
51172	negative regulation of nitrogen compound metabolic process	0.24781	0.46789	3/107 2.8%	466/28958 1.6%	TBX2 HIPK3 SMARCA5
1508	regulation of action potential	0.2483	0.46789	1/107 0.9%	77/28958 0.2%	CLDN1
7188	G-protein signaling, coupled to cAMP nucleotide second messenger	0.2483	0.46789	1/107 0.9%	77/28958 0.2%	ADCY2
43623	cellular protein complex assembly	0.25108	0.47178	1/107 0.9%	78/28958 0.2%	UNC13B
6915	apoptosis	0.25374	0.4729	3/107 2.8%	472/28958 1.6%	HIPK3 ALMS1 CDK11B
122	negative regulation of transcription from RNA polymerase II promoter	0.25379	0.4729	2/107 1.8%	263/28958 0.9%	TBX2 HIPK3
45761	regulation of adenylate cyclase activity	0.25386	0.4729	1/107 0.9%	79/28958 0.2%	ADCY2
51339	regulation of lyase activity	0.25938	0.47977	1/107 0.9%	81/28958 0.2%	ADCY2
12501	programmed cell death	0.26169	0.47977	3/107 2.8%	480/28958 1.6%	HIPK3 ALMS1 CDK11B
10558	negative regulation of macromolecule biosynthetic process	0.26169	0.47977	3/107 2.8%	480/28958 1.6%	TBX2 HIPK3 SMARCA5
31279	regulation of cyclase activity	0.26212	0.47977	1/107 0.9%	82/28958 0.2%	ADCY2
7423	sensory organ development	0.26473	0.47977	2/107 1.8%	271/28958 0.9%	ALMS1 COL8A2
9201	ribonucleoside triphosphate biosynthetic process	0.26486	0.47977	1/107 0.9%	83/28958 0.2%	ATP8A2
9206	purine ribonucleoside triphosphate biosynthetic process	0.26486	0.47977	1/107 0.9%	83/28958 0.2%	ATP8A2
51101	regulation of DNA binding	0.26486	0.47977	1/107 0.9%	83/28958 0.2%	HIPK3
6865	amino acid transport	0.26486	0.47977	1/107 0.9%	83/28958 0.2%	SLC38A2
51093	negative regulation of developmental process	0.2661	0.47977	2/107 1.8%	272/28958 0.9%	INHBA MEPE
9145	purine nucleoside triphosphate biosynthetic process	0.26758	0.47977	1/107 0.9%	84/28958 0.2%	ATP8A2
7187	G-protein signaling, coupled to cyclic nucleotide second messenger	0.26758	0.47977	1/107 0.9%	84/28958 0.2%	ADCY2
226	microtubule cytoskeleton organization	0.2703	0.47977	1/107 0.9%	85/28958 0.2%	TEKT2
19933	cAMP-mediated signaling	0.2703	0.47977	1/107 0.9%	85/28958 0.2%	ADCY2
9142	nucleoside triphosphate biosynthetic process	0.2703	0.47977	1/107 0.9%	85/28958 0.2%	ATP8A2
44260	cellular macromolecule metabolic process	0.27037	0.47977	17/107 15.8%	3903/28958 13.4%	GNA14 PGAP2 A730011L01RIK TBX2 MID1 SLBP GAK MAST4 HIPK3 TYW1 RPLP1 SMARCA5 FKBP15 MLXIP CDK11B ASPH ARNTL2
7605	sensory perception of sound	0.273	0.47977	1/107 0.9%	86/28958 0.2%	ALMS1
80135	regulation of cellular response to stress	0.273	0.47977	1/107 0.9%	86/28958 0.2%	HIPK3
6836	neurotransmitter transport	0.273	0.47977	1/107 0.9%	86/28958 0.2%	UNC13B
30879	mammary gland development	0.273	0.47977	1/107 0.9%	86/28958 0.2%	TBX2
31327	negative regulation of cellular biosynthetic process	0.27466	0.48077	3/107 2.8%	493/28958 1.7%	TBX2 HIPK3 SMARCA5
30817	regulation of cAMP biosynthetic process	0.27569	0.48077	1/107 0.9%	87/28958 0.3%	ADCY2
7346	regulation of mitotic cell cycle	0.27838	0.48077	1/107 0.9%	88/28958 0.3%	CDK11B
48545	response to steroid hormone stimulus	0.27838	0.48077	1/107 0.9%	88/28958 0.3%	ACR
6796	phosphate metabolic process	0.2797	0.48077	5/107 4.6%	957/28958 3.3%	MAST4 HIPK3 CDK11B INPP5A GAK
6793	phosphorus metabolic process	0.2797	0.48077	5/107 4.6%	957/28958 3.3%	MAST4 HIPK3 CDK11B INPP5A GAK
51216	cartilage development	0.28105	0.48077	1/107 0.9%	89/28958 0.3%	COL10A1
6913	nucleocytoplasmic transport	0.28105	0.48077	1/107 0.9%	89/28958 0.3%	MLXIP
30814	regulation of cAMP metabolic process	0.28105	0.48077	1/107 0.9%	89/28958 0.3%	ADCY2
1701	in utero embryonic development	0.28115	0.48077	2/107 1.8%	283/28958 0.9%	1 CDK11B
9890	negative regulation of biosynthetic process	0.28168	0.48077	3/107 2.8%	500/28958 1.7%	TBX2 HIPK3 SMARCA5
22612	gland morphogenesis	0.28372	0.48173	1/107 0.9%	90/28958 0.3%	TBX2
3007	heart morphogenesis	0.28372	0.48173	1/107 0.9%	90/28958 0.3%	TBX2
16331	morphogenesis of embryonic epithelium	0.28637	0.48247	1/107 0.9%	91/28958 0.3%	SHANK3
19935	cyclic-nucleotide-mediated signaling	0.28637	0.48247	1/107 0.9%	91/28958 0.3%	ADCY2
51169	nuclear transport	0.28637	0.48247	1/107 0.9%	91/28958 0.3%	MLXIP
6650	glycerophospholipid metabolic process	0.29428	0.49451	1/107 0.9%	94/28958 0.3%	PGAP2
51301	cell division	0.29617	0.49488	2/107 1.8%	294/28958 1.0%	CDK11B STAG1
30802	regulation of cyclic nucleotide biosynthetic process	0.29689	0.49488	1/107 0.9%	95/28958 0.3%	ADCY2
30808	regulation of nucleotide biosynthetic process	0.29689	0.49488	1/107 0.9%	95/28958 0.3%	ADCY2
8610	lipid biosynthetic process	0.29754	0.49488	2/107 1.8%	295/28958 1.0%	PGAP2 EPT1
50954	sensory perception of mechanical stimulus	0.2995	0.49688	1/107 0.9%	96/28958 0.3%	ALMS1
19226	transmission of nerve impulse	0.30027	0.49689	2/107 1.8%	297/28958 1.0%	CLDN1 UNC13B

## Sheet: Cytoscape Hand Selection
Go-ID	Description	p-Value	Corrected p-Value	Cluster Freq	Total Freq	Genes	Final Gene List
7521	muscle cell fate determination	0.0073765	0.22503	1/107 0.9%	2/28958 0.0%	TBX2	Alms1
60596	mammary placode formation	0.011044	0.22503	1/107 0.9%	3/28958 0.0%	TBX2	Asph
42693	muscle cell fate commitment	0.014699	0.25442	1/107 0.9%	4/28958 0.0%	TBX2	Cdk11b
60788	ectodermal placode formation	0.039909	0.32028	1/107 0.9%	11/28958 0.0%	TBX2	Col10a1
71697	ectodermal placode morphogenesis	0.039909	0.32028	1/107 0.9%	11/28958 0.0%	TBX2	Col8a2
71696	ectodermal placode development	0.039909	0.32028	1/107 0.9%	11/28958 0.0%	TBX2	Flnb
9790	embryonic development	0.04354	0.32028	6/107 5.6%	692/28958 2.3%	NAT8 INHBA 1 SMARCA5 CDK11B SHANK3	Hipk3
60325	face morphogenesis	0.046994	0.32028	1/107 0.9%	13/28958 0.0%	ASPH	Ibsp
9888	tissue development	0.047975	0.32028	6/107 5.6%	709/28958 2.4%	IBSP INHBA TBX2 FLNB SHANK3 COL10A1	Inhba
60323	head morphogenesis	0.061009	0.32339	1/107 0.9%	17/28958 0.0%	ASPH	Mepe
60324	face development	0.061009	0.32339	1/107 0.9%	17/28958 0.0%	ASPH	Nat8
60322	head development	0.081648	0.35719	1/107 0.9%	23/28958 0.0%	ASPH	Shank3
14706	striated muscle tissue development	0.083667	0.35719	2/107 1.8%	130/28958 0.4%	TBX2 FLNB	Smarca5
60348	bone development	0.092583	0.35719	2/107 1.8%	138/28958 0.4%	IBSP COL10A1	Stag1
60350	endochondral bone morphogenesis	0.095158	0.35719	1/107 0.9%	27/28958 0.0%	COL10A1	Tbx2
1709	cell fate determination	0.095158	0.35719	1/107 0.9%	27/28958 0.0%	TBX2	Wnt5b
60537	muscle tissue development	0.095996	0.35719	2/107 1.8%	141/28958 0.4%	TBX2 FLNB
1501	skeletal system development	0.10531	0.35719	3/107 2.8%	307/28958 1.0%	IBSP MEPE COL10A1
60349	bone morphogenesis	0.13772	0.40119	1/107 0.9%	40/28958 0.1%	COL10A1
60021	palate development	0.14091	0.40119	1/107 0.9%	41/28958 0.1%	ASPH
7517	muscle organ development	0.14573	0.40862	2/107 1.8%	182/28958 0.6%	TBX2 FLNB
48513	organ development	0.16855	0.41294	9/107 8.4%	1680/28958 5.8%	IBSP INHBA WNT5B TBX2 ALMS1 COL8A2 FLNB SHANK3 COL10A1
48598	embryonic morphogenesis	0.16896	0.41294	3/107 2.8%	383/28958 1.3%	NAT8 INHBA SHANK3
61061	muscle structure development	0.20217	0.43191	2/107 1.8%	225/28958 0.7%	TBX2 FLNB
60538	skeletal muscle organ development	0.23988	0.46001	1/107 0.9%	74/28958 0.2%	FLNB
6915	apoptosis	0.25374	0.4729	3/107 2.8%	472/28958 1.6%	HIPK3 ALMS1 CDK11B
12501	programmed cell death	0.26169	0.47977	3/107 2.8%	480/28958 1.6%	HIPK3 ALMS1 CDK11B
7346	regulation of mitotic cell cycle	0.27838	0.48077	1/107 0.9%	88/28958 0.3%	CDK11B
51216	cartilage development	0.28105	0.48077	1/107 0.9%	89/28958 0.3%	COL10A1
51301	cell division	0.29617	0.49488	2/107 1.8%	294/28958 1.0%	CDK11B STAG1
